# Supplementary material
Source: MDPI journal article supplement (https://www.mdpi.com/search?q=viruses-08-00103)
Supplement: s001 [file viruses-08-00103-s001.pdf]

# Supplementary Materials: ESCRT Requirements for Murine Leukemia Virus Release

Christina Bartusch and Reinhild Prange

Table S1. siRNAs used in this study.

| Gene description    | siRNA Target Sequence |
|---------------------|-----------------------|
| Tsg101 <sup>1</sup> | CUCAAUGCCUUGAAACGAA   |
| Alix <sup>1</sup>   | GCAGUAAUAUGUCUGCUCA   |
| Nedd4-1             | GGGAUUCUUUGAACUAAUA   |
| Nedd4-1             | GGAGGGAACAUACAAAGUA   |
| Nedd4-1             | GAUCACAAUCCAGAACGA    |
| Nedd4-1             | GAUCACAAUCCAGAACGA    |
| EAP20               | GUCGAUCCAGAUUGUAUUA   |
| EAP20               | GGGAAACUCAUCUAUCAGU   |
| EAP20               | GCACAAGGCCGAGAUCAUC   |
| EAP20               | CAGAACAACUCCGUCUUUA   |
| EAP30 <sup>1</sup>  | GAAUGGAGGUCUGAUAAACU  |
| EAP45 <sup>1</sup>  | GGAAUAUUGCAGGUGCCU    |
| CHMP1A              | GAAGGUCUCCUCAGUGAUG   |
| CHMP1A              | GAGAACGCCAUCCGCAAGA   |
| CHMP1A              | CACCGCGUCUUGCCUUUGU   |
| CHMP1A              | GGUGUUGAGUUUCUGCAA    |
| CHMP1B              | GAAGAUUUCUGCUUUGAUG   |
| CHMP1B              | GGAGCAGGAUGAACUGUCU   |
| CHMP1B              | GAUAUGCUGCUCCAGGAAA   |
| CHMP1B              | GAGGAUACACGCCGAAAAU   |
| CHMP2A              | AGGCAGAGAUCAUGGAUUA   |
| CHMP2A              | GCGCAAGUUUGUAUUGAUG   |
| CHMP2A              | UUAAGAAGAUGGCCAAGCA   |
| CHMP2A              | CAGAUGAGCUGUCGAACCU   |
| CHMP2B              | GAAGAUGGCUGGAGCAAUG   |
| CHMP2B              | UAAGGAAGCUUGCAAAGUU   |
| CHMP2B              | GCUCGAAGCUUACCAUCUG   |
| CHMP2B              | GCCAGGAUAUUGUGAAUCA   |
| CHMP3               | UGACAGAAUUCUCUUUGAA   |
| CHMP3               | GAAGAGCACAGAAGUGAUG   |
| CHMP3               | GGGCAAAGCACCCAGUAAA   |
| CHMP3               | AGAACCAGCUCGCGGUCU    |
| CHMP4A              | CAAGGUAGAUGAACUGAUG   |
| CHMP4A              | UAAGAGAGCUGCCCUACAG   |
| CHMP4A              | GGAAUUGGCCCAGGAGUUG   |
| CHMP4A              | GAAGCAAUACAGAAACUGA   |
| CHMP4B              | GCAGAUCCGACGGCACAUUA  |
| CHMP4B              | GGACAUCGAUAAAGUUGAU   |
| CHMP4B              | GGAAAUCAGUGGACCCGAA   |
| CHMP4B              | GGACACGGAAGAGAUGUUA   |
| CHMP4B <sup>1</sup> | GGCUAUGCCGCCAAGGCCA   |
| CHMP5 <sup>1</sup>  | CAGAAAGCCUUGCGAGUUU   |
| CHMP6               | UCACCCAGAUCGAAAUGAA   |
| CHMP6               | CGCAAUCACUCAGGAACAA   |

CHMP6 GAGUACCAGCGGCAAUAG  
CHMP6 CGGAUUAACUCUCGACCGA

---

<sup>1</sup> siRNA was applied in single format.

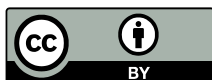

© 2016 by the authors; licensee MDPI, Basel, Switzerland. This article is an open access article distributed under the terms and conditions of the Creative Commons by Attribution (CC-BY) license (<http://creativecommons.org/licenses/by/4.0/>).
